# Supplementary material for: Diacylglycerol Kinase-ε: Properties and Biological Roles
Source: PubMed Central journal article supplement (PMC5067486; doi:10.3389/fcell.2016.00112), 2016-10-18
Supplement: Table1.pdf [file Table1.pdf]

## Supplemental Figure 1

Excerpts from DGKε sequence alignment from different Vertebrate and some invertebrate species showing the conservation of Proline residue at position 33 (highlighted) in the sequence.

|                                |                                | 25                                                                  | 41                                                                  |
|--------------------------------|--------------------------------|---------------------------------------------------------------------|---------------------------------------------------------------------|
| Primates                       | Homo sapiens                   | 5616188                                                             | WTLC <span style="background-color: #e0f0ff;">SVLLPVF</span> ITFWCS |
|                                | Gorilla gorilla gorilla        | 426347426                                                           | WTLC <span style="background-color: #e0f0ff;">SVLLPVF</span> ITFWCS |
|                                | Pan troglodytes                | 694968683                                                           | WTLC <span style="background-color: #e0f0ff;">SVLLPVF</span> ITFWCS |
|                                | Pan paniscus                   | 675742782                                                           | WTLC <span style="background-color: #e0f0ff;">SVLLPVF</span> ITFWCS |
|                                | Pongo abelii                   | 686753387                                                           | WTLC <span style="background-color: #e0f0ff;">SVLLPXV</span> ITFWCS |
|                                | Macaca fascicularis            | 67972066                                                            | WTLC <span style="background-color: #e0f0ff;">SVLLPVF</span> ITFWCS |
|                                | Macaca mulatta                 | 297272634                                                           | WTLC <span style="background-color: #e0f0ff;">SVLLPVF</span> ITFWCS |
|                                | Macaca nemestrina              | 795620848                                                           | WTLC <span style="background-color: #e0f0ff;">SVLLPVF</span> ITFWCS |
|                                | Chlorocebus sabaeus            | 635089833                                                           | WTLC <span style="background-color: #e0f0ff;">SVLLPVF</span> ITFWCS |
|                                | Cercocebus atys                | 795571756                                                           | WTLC <span style="background-color: #e0f0ff;">SVLLPVF</span> ITFWCS |
|                                | Rhinopithecus roxellana        | 724909225                                                           | WTLC <span style="background-color: #e0f0ff;">SVLLPVF</span> ITFWCS |
|                                | Colobus angolensis palliatus   | 795243343                                                           | WTLC <span style="background-color: #e0f0ff;">SVLLPVF</span> ITFWCS |
|                                | Papio anubis                   | 685597505                                                           | WTLC <span style="background-color: #e0f0ff;">SVLLPVF</span> ITFWCS |
|                                | Callithrix jacchus             | 296202403                                                           | WTLC <span style="background-color: #e0f0ff;">SVLLPVF</span> ITFWCS |
|                                | Aotus nancymae                 | 817291140                                                           | WTLC <span style="background-color: #e0f0ff;">SVLLPVF</span> ITFWCS |
|                                | Saimiri boliviensis boliviensi | 403279700                                                           | WTLC <span style="background-color: #e0f0ff;">SVLLPVF</span> ITFWCS |
|                                | Otolemur garnettii             | 395845794                                                           | WTLC <span style="background-color: #e0f0ff;">SVLLPVF</span> ITFWCS |
|                                | Tarsius syrichta               | 640826139                                                           | WTLC <span style="background-color: #e0f0ff;">SVLLPVF</span> ITCWCS |
|                                | Propithecus coquereli          | 826274413                                                           | WTLC <span style="background-color: #e0f0ff;">SVLLPVF</span> ITFWCS |
|                                | Rodents                        | Microcebus murinus                                                  | 29719269                                                            |
| Mesocricetus auratus           |                                | 24951727                                                            | WTLC <span style="background-color: #e0f0ff;">SVLLPVF</span> ITFWCS |
| Nannospalax galili             |                                | 74060070                                                            | WTLC <span style="background-color: #e0f0ff;">SVLLPVF</span> ITFWCS |
| Cricetulus griseus             |                                | 44243468                                                            | WTLC <span style="background-color: #e0f0ff;">SVLLPVF</span> ITFWCS |
| Peromyscus maniculatus bairdii |                                | 89917547                                                            | WTLC <span style="background-color: #e0f0ff;">SVLLPVL</span> ITLWCS |
| Cricetulus griseus             |                                | 25188058                                                            | WTLC <span style="background-color: #e0f0ff;">SVLLPVF</span> ITFWCS |
| Mus musculus                   |                                | 6336623                                                             | WTLC <span style="background-color: #e0f0ff;">SVLLPVF</span> ITLWCS |
| Microtus ochrogaster           |                                | 32013590                                                            | WTLC <span style="background-color: #e0f0ff;">SVLLPVF</span> ITFWCS |
| Rattus norvegicus              |                                | 49053838                                                            | WTLC <span style="background-color: #e0f0ff;">SVLLPVF</span> ITLWCS |
| Chrysochloris asiatica         |                                | 86449525                                                            | WTLC <span style="background-color: #e0f0ff;">SVLLPVF</span> ITFWCS |
| Elephantulus edwardii          |                                | 85671592                                                            | WTLC <span style="background-color: #e0f0ff;">SVLLPVF</span> ITFWCS |
| Dasytus novemcinctus           |                                | 21140633                                                            | WTLC <span style="background-color: #e0f0ff;">SVLLPVF</span> ITFWCS |
| Other Mammals                  | Tupaia chinensis               | 47277591                                                            | WTLC <span style="background-color: #e0f0ff;">SVLLPVF</span> VTFWCS |
|                                | Loxodonta africana             | 44285375                                                            | WTLC <span style="background-color: #e0f0ff;">SVLLPVF</span> ITFWCS |
|                                | Orycteropus afer afer          | 34872742                                                            | WTLC <span style="background-color: #e0f0ff;">SVLLPVF</span> ITFWCS |
|                                | Trichechus manatus latirostris | 71380322                                                            | WTLC <span style="background-color: #e0f0ff;">SVLLPVF</span> ITFWCS |
|                                | Monodelphis domestica          | 11990756                                                            | WTLC <span style="background-color: #e0f0ff;">SVLLPVL</span> ITLWCS |
|                                | Sarcophilus harrisii           | 21480855                                                            | WTLC <span style="background-color: #e0f0ff;">SVLVPVL</span> ITLWCN |
|                                | Ornithorhynchus anatinus       | 20985162                                                            | WTLC <span style="background-color: #e0f0ff;">SVLLPVL</span> LTLWCS |
|                                | Equus caballus                 | 545179273                                                           | WTLC <span style="background-color: #e0f0ff;">SVLLPVF</span> ITFWCS |
|                                | Chinchilla lanigera            | 533160536                                                           | WTLC <span style="background-color: #e0f0ff;">SVLLPVF</span> ITFWCS |
|                                | Heterocephalus glaber          | 512996527                                                           | WTLC <span style="background-color: #e0f0ff;">SVLLPVF</span> ITFWCS |
|                                | Fukomys damarensis             | 676281227                                                           | WTLC <span style="background-color: #e0f0ff;">SVLLPVF</span> ITFWCS |
|                                | Dipodomys ordii                | 852732227                                                           | WTLC <span style="background-color: #e0f0ff;">SVLLPVF</span> ITFWCS |
|                                | Leptonychotes weddellii        | 585194198                                                           | WTLC <span style="background-color: #e0f0ff;">SVLLPVF</span> ITFWCS |
|                                | Ailuropoda melanoleuca         | 301759659                                                           | WTLC <span style="background-color: #e0f0ff;">SVLLPVF</span> ITFWCS |
|                                | Mustela putorius furo          | 511846013                                                           | WTLC <span style="background-color: #e0f0ff;">SVLLPVF</span> ITFWCS |
|                                | Octodon degus                  | 507704592                                                           | WTLC <span style="background-color: #e0f0ff;">SVLLPVF</span> ITFWCS |
|                                | Ceratotherium simum simum      | 478521197                                                           | WTLC <span style="background-color: #e0f0ff;">SVLLPVF</span> ITFWCS |
|                                | Panthera tigris altaica        | 591321210                                                           | WTLC <span style="background-color: #e0f0ff;">SVLLPVF</span> ITFWCS |
|                                | Felis catus                    | 410980673                                                           | WTLC <span style="background-color: #e0f0ff;">SVLLPVF</span> ITFWCS |
|                                | Canis lupus familiaris         | 73966623                                                            | WTLC <span style="background-color: #e0f0ff;">SVLLPVF</span> ITFWCS |
| Ovis aries                     | 803112718                      | WTLC <span style="background-color: #e0f0ff;">SVLLPVF</span> ITFWCS |                                                                     |
| Capra hircus                   | 926715761                      | WTLC <span style="background-color: #e0f0ff;">SVLLPVF</span> ITFWCS |                                                                     |
| Bubalus bubalis                | 594106732                      | WTLC <span style="background-color: #e0f0ff;">SVLLPVF</span> ITFWCS |                                                                     |
| Bos taurus                     | 300793691                      | WTLC <span style="background-color: #e0f0ff;">SVLLPVF</span> ITFWCS |                                                                     |
| Bison bison bison              | 742175154                      | WTLC <span style="background-color: #e0f0ff;">SVLLPVF</span> ITFWCS |                                                                     |
| Bos mutus                      | 555987838                      | WTLC <span style="background-color: #e0f0ff;">SVLLPVF</span> ITFWCS |                                                                     |
| Camelus ferus                  | 560910323                      | WTLC <span style="background-color: #e0f0ff;">SVLLPVF</span> ITFWCS |                                                                     |
| Vicugna pacos                  | 560988630                      | WTLC <span style="background-color: #e0f0ff;">SVLLPVF</span> ITFWCS |                                                                     |
| Physeter catodon               | 593727630                      | WTLC <span style="background-color: #e0f0ff;">SVLLPVF</span> ITFWCS |                                                                     |
| Orcinus orca                   | 466019059                      | WTLC <span style="background-color: #e0f0ff;">SVLLPVF</span> ITFWCS |                                                                     |

|                     |                                 |                   |                   |
|---------------------|---------------------------------|-------------------|-------------------|
| Other Mammals       | Lipotes vexillifer              | 602707331         | WTLCSVLLPVFITFWCS |
|                     | Balaenoptera acutorostrata sca  | 594655682         | WTLCSVLLPVFITFWCS |
|                     | Pteropus alecto                 | 586540170         | WTLCSVLLPVFITFWCS |
|                     | Cavia porcellus                 | 348562564         | WTLCSVLLPVFITFWCS |
|                     | Ursus maritimus                 | 671005957         | WTLCSVLLPVFITFWCR |
|                     | Sorex araneus                   | 505802581         | WTLCSVLLPVFITFWCS |
|                     | Sus scrofa                      | 264681444         | YTLCSVLLPVFITFWCS |
|                     | Myotis brandtii                 | 554556336         | WTLCSVLLPVFITFWCS |
|                     | Eptesicus fuscus                | 641713396         | WTLCSVLLPVFITFWCS |
|                     | Jaculus jaculus                 | 507572892         | WTLCSVLLPVFITLWCS |
|                     | Erinaceus europaeus             | 617618893         | WTLCSVLLPVLITCWCS |
|                     | Oryctolagus cuniculus           | 291405752         | WTLCSVLLPVAVTLWCS |
|                     | Ochotona princeps               | 504168622         | WTLCSVLLPVAVTLWCS |
|                     | Alligator sinensis              | 557263924         | WTLCSVVVPLITLWCS  |
|                     | Alligator mississippiensis      | 950994220         | WTLCSVVVPLITLWCS  |
|                     | Chelonia mydas                  | 591360518         | WTLCSVILPVVITLWCS |
|                     | Chrysemys picta bellii          | 641760021         | WTLCSVILPVVITLWCS |
|                     | Condylura cristata              | 830038813         | WTLCSVLLPVFITFWCS |
|                     | Reptiles                        | Chaetura pelagica | 701422173         |
| Calypte anna        |                                 | 663263247         | WTLCSVLLPVLITLWCS |
| Opisthocomus hoazin |                                 | 700392595         | WTLCAVLLPVLITLWCS |
| Picoides pubescens  |                                 | 678196712         | WTLCSVLLPVLITLWCS |
| Birds               | Serinus canaria                 | 683924150         | WTLCSVLLPVLITAWCS |
|                     | Tauraco erythrolophus           | 701327655         | WTLCAIILPVLITVWCS |
|                     | Anser cygnoides domesticus      | 902889883         | WTLCSVIVPVLITLWCS |
|                     | Balearica regulorum gibbericeps | 723547949         | WTLCSVLLPVLITLWCS |
|                     | Gavia stellata                  | 698449606         | WTLCSVILPVLITLWCS |
|                     | Amazona aestiva                 | 944212817         | WTLCSVLLPVLITVWCS |
|                     | Nipponia nippon                 | 694848337         | WTLCSVILPVLITLWCS |
|                     | Columba livia                   | 543723927         | WTLCAVILPVLITLWCS |
|                     | Aptenodytes forsteri            | 686617944         | WTLCSVILPVLITLWCS |
|                     | Haliaeetus leucocephalus        | 729760143         | WTLCSVILPVLITLWCS |
|                     | Phalacrocorax carbo             | XP_009505860      | WTLCSVLLPVLITLWCS |
|                     | Chaetura pelagica               | XP_010000988      | WTLCSVLLPVLITLWCS |
|                     | Gavia stellata                  | XP_009818613      | WTLCSVILPVLITLWCS |
|                     | Aquila chrysaetos canadensis    | XP_011585227      | WTLCSVILPVLITLWCS |
| Fishes              | Pygocentrus nattereri           | XP_017548559      | WTGLAVLLPILITLWCS |
|                     | Sinocyclocheilus rhinoceros     | XP_016370480      | WTTVAVLVPVLITLWCS |
|                     | Astyanax mexicanus              | XP_007234459      | WTSIAILLPVLITLWCS |
|                     | Danio rerio                     | XP_001920687      | WTTFAVLVPVLITLWCS |
| Arthropoda          | Ictalurus punctatus             | XP_017337227      | WTGLAVLLPVLITLWCS |
|                     | Papilio polytes                 | XP_013141971      | CQLCDTYFPVYQMEWCS |
|                     | Papilio xuthus                  | XP_013167633      | CQLCDTYFPVYQMEWCS |
|                     | Papilio machaon                 | XP_014363046      | CQLCDTYFPVYQMEWCS |
